# Supplementary material
Source: PubMed Central journal article supplement (PMC4674367)
Supplement: NIHMS728219-supplement-1.pdf [file NIHMS728219-supplement-1.pdf]

**Recombinant Immunotoxin with T Cell Epitope Mutations that Greatly Reduce  
Immunogenicity for Treatment of Mesothelin Expressing Tumors**

Ronit Mazor, Jingli Zhang, Laiman Zhang, Selamawit Addissie, Prince Awuah, Richard Beers,  
Raffit Hassan, and Ira Pastan

Laboratory of Molecular Biology, Center for Cancer Research, National Cancer Institute,  
National Institutes of Health, Bethesda, MD

**SUPPLEMENTARY INFORMATION**

**Table S1. Cytotoxic activity *in vitro* in five cell lines**

| Disease model        | Cell line | IC <sub>50</sub> (pMolar) |            |                   |         |                    |
|----------------------|-----------|---------------------------|------------|-------------------|---------|--------------------|
|                      |           | SS1P                      | SS1-LR-GGS | Relative activity | LMB-T20 | Relative activity* |
| Mesothelioma         | HAY       | 9±2                       | 2±0        | 450%              | 3±1     | 300%               |
| Pancreatic cancer    | KLM1      | 47±17                     | 7±1        | 671%              | 14±0    | 335%               |
| Lung cancer          | L55       | 41±13                     | 20±2       | 205%              | 24±6    | 178%               |
| Stomach cancer       | MKN74     | 33±10                     | 7±2        | 471%              | 13±1    | 253%               |
| Epidermoid carcinoma | A431/H9   | 0.4±0                     | 1.3±0      | 31%               | 1.6±0   | 25%                |

± SEM

IC<sub>50</sub> values were determined by averaging IC<sub>50</sub> of three independent assays

\*Relative activity compared to SS1P

**Table S2. In vivo toxicity of RITs**

|                | <b>Dose<br/>(mg/kg)</b> | <b>Response</b> | <b>Average<br/>change in<br/>weight</b> | <b>Number of<br/>doses</b> | <b>Frequency</b> | <b>Number<br/>of mice</b> |
|----------------|-------------------------|-----------------|-----------------------------------------|----------------------------|------------------|---------------------------|
| <b>SS1-LR-</b> | 5                       | 1/8 Died        | (-5%)                                   | 2                          | QOD              | 8                         |
| <b>GGs</b>     | <b>10</b>               | 2/2 Died        | *                                       | 1                          | -                | 2                         |
|                | 5                       | Healthy         | (-0.1%)                                 | 6                          | QD               | 8                         |
| <b>LMB-T20</b> | 10                      | Healthy         | (-1%)                                   | 2                          | 72 hours         | 3                         |
|                | 15                      | Healthy         | (-9%)                                   | 2                          | 72 hours         | 3                         |
|                | <b>20</b>               | 1/2 Died        | (-12%)                                  | 2                          | 72 hours         | 2                         |

\*No data-mice died prior to weight measurement

QOD, every other day

QD, every day

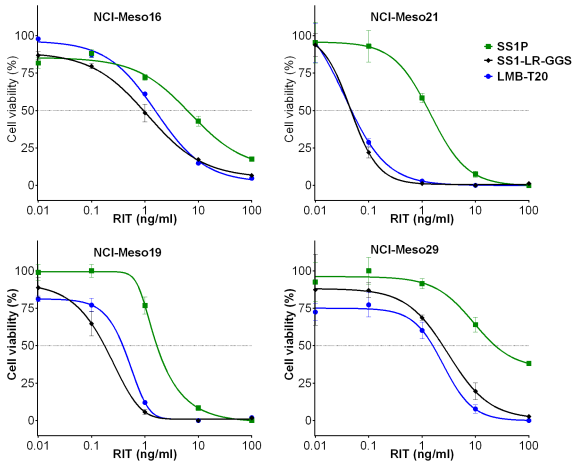

**Figure S1. Cytotoxic activity in patients cells curves.**

Cells cultured from the pleural fluid or ascites of four mesothelioma patients (NCI-Meso16, NCI-Meso19, NCI-Meso21, and NCI-Meso29) were treated with increasing concentrations of RITs. After 72 hours, cells were evaluated for viability using a WST-8 assay and  $IC_{50}$  were calculated. The  $IC_{50}$  are plotted in Figure 5. Cells were treated in three replicas. Line represents mean, error bar show SEM

$IC_{50}$  (SS1P: 111pM, 51pM, 22pM and 146pM, for SS1-LR-GGS: 22pM, 4pM, 1pM and 57pM and for LMB-T20 33pM, 8pM, 1pM and 51pM in patients NCI-Meso16, NCI-Meso19, NCI-Meso21 and NCI-Meso29, respectively).
